# Supplementary material for: The Direct and Indirect Costs of Colorectal Cancer in Vietnam: An Economic Analysis from a Social Perspective
Source: PubMed Central journal article supplement (PMC7792935; doi:10.3390/ijerph18010012), 2020-12-22
Supplement: ijerph-18-00012-s001.pdf [file ijerph-18-00012-s001.pdf]

## Supplementary Materials

Supplementary Table S1. Number of CRC cases for each data source in estimation of total cost at national level in Vietnam, 2018

| Variables     | Original studies<br>(to estimate average cost per patient) |            |                                  |           | Number of CRC in Vietnam<br>(expected cases to estimate the total economic burden ) |              |              |              |              |              |
|---------------|------------------------------------------------------------|------------|----------------------------------|-----------|-------------------------------------------------------------------------------------|--------------|--------------|--------------|--------------|--------------|
|               | Medical claims 2018                                        |            | Hospital-based survey            |           | GLOBOCAN (2018)                                                                     |              |              |              |              |              |
|               | N=531                                                      |            | N=120*                           |           | Prevalent cases                                                                     |              |              | Death cases  |              |              |
|               | Male                                                       | Female     | Male                             | Female    | All                                                                                 | Male         | Female       | All          | Male         | Female       |
| All           | 311 (58.6)                                                 | 220 (41.4) | 67 (55.8)                        | 53 (44.2) | 9,481 (100.0)                                                                       | 4,857 (51.2) | 4,624 (48.8) | 8,104 (100)  | 4,116 (50.8) | 3,988 (49.2) |
| Age (mean±SD) | 55.86 ± 15.6<br>(min,max: 1-98)                            |            | 57.2 ± 13.2<br>(min, max: 20-80) |           |                                                                                     |              |              |              |              |              |
| Less than 30  | 11 (3.5)                                                   | 6 (2.7)    | 2 (3.0)**                        | 2 (3.8)** | 184 (1.9)                                                                           | 77 (1.6)     | 107 (2.3)    | 67 (0.8)     | 33 (0.8)     | 34 (0.9)     |
| 30-39         | 18 (5.8)                                                   | 23 (10.5)  | 5 (7.5)                          | 5 (9.4)   | 364 (3.8)                                                                           | 177 (3.6)    | 187 (4.0)    | 249 (3.1)    | 128 (3.1)    | 121 (3.0)    |
| 40-49         | 34 (10.9)                                                  | 30 (13.6)  | 7 (10.4)                         | 5 (9.4)   | 1,235 (13.0)                                                                        | 694 (14.3)   | 541 (11.7)   | 786 (9.7)    | 435 (10.6)   | 351 (8.8)    |
| 50-59         | 100 (32.2)                                                 | 49 (22.3)  | 16 (23.9)                        | 14 (26.4) | 2,529 (26.7)                                                                        | 1,357 (27.9) | 1,172 (25.3) | 1,592 (19.6) | 880 (24.4)   | 712 (17.9)   |
| 60-69         | 89 (28.6)                                                  | 47 (21.4)  | 26 (38.8)                        | 20 (37.7) | 2,644 (27.9)                                                                        | 1,389 (28.6) | 1,255 (27.1) | 1,886 (23.3) | 1,016 (24.7) | 870 (21.8)   |
| 70+           | 59 (19.0)                                                  | 65 (29.5)  | 11 (16.4)                        | 7 (13.2)  | 2,525 (26.6)                                                                        | 1,163 (23.9) | 1,362 (29.5) | 3,524 (43.5) | 1,624 (39.5) | 1,900 (47.6) |

\*: study surveyed those ≥20. ; \*\*: those aged 20-29 years; data present as number and percentage. Age groups: Percentage was presented in parenthesis.

Supplementary Table S1. Characteristics of patients with colorectal cancer and their clinical characteristics used in estimation of direct medical cost, Hue Central Hospital, 2018

| Variables                    | Type of cancers |      |              |      |                             |       | All         |      | p-value* |
|------------------------------|-----------------|------|--------------|------|-----------------------------|-------|-------------|------|----------|
|                              | Colon (C18)     |      | Rectum (C20) |      | Rectosigmoid junction (C19) |       |             |      |          |
|                              | n               | %    | n            | %    | n                           | %     | n           | %    |          |
| All                          | 268             | 50.5 | 256          | 48.2 | 7                           | 1.3   | 531         | 1    | 0.60     |
| Gender                       |                 |      |              |      |                             |       |             |      |          |
| Male                         | 154             | 57.5 | 153          | 59.8 | 3                           | 42.9  | 310         | 58.4 |          |
| Female                       | 114             | 42.5 | 103          | 40.2 | 4                           | 57.1  | 221         | 41.6 | 0.020    |
| Age                          |                 |      |              |      |                             |       |             |      |          |
| Less than 30 years           | 12              | 4.5  | 5            | 2.0  | 0                           | 0.0   | 17          | 3.2  |          |
| 30-39                        | 23              | 8.6  | 18           | 7.0  | 0                           | 0.0   | 41          | 7.7  |          |
| 40-49                        | 33              | 12.3 | 31           | 12.1 | 0                           | 0.0   | 64          | 12.1 |          |
| 50-59                        | 65              | 24.3 | 81           | 31.6 | 2                           | 28.6  | 148         | 27.9 |          |
| 60-69                        | 78              | 29.1 | 58           | 22.7 | 2                           | 28.6  | 138         | 26.0 |          |
| 70-79                        | 42              | 15.7 | 37           | 14.5 | 0                           | 0.0   | 79          | 14.9 |          |
| 80+                          | 15              | 5.6  | 26           | 10.2 | 3                           | 42.9  | 44          | 8.3  |          |
| Health Insurance             |                 |      |              |      |                             |       |             |      |          |
| 0                            | 6               | 2.2  | 10           | 3.9  | 1                           | 14.3  | 17          | 3.2  |          |
| less than 50%                | 9               | 3.4  | 4            | 1.6  | 0                           | 0.0   | 13          | 2.4  |          |
| 80%                          | 93              | 34.7 | 74           | 28.9 | 2                           | 28.6  | 169         | 31.8 |          |
| 95%                          | 22              | 8.2  | 18           | 7.0  | 0                           | 0.0   | 40          | 7.5  |          |
| 100%                         | 138             | 51.5 | 50           | 19.5 | 4                           | 57.1  | 192         | 36.2 |          |
| Stages                       |                 |      |              |      |                             |       |             |      | 0.15     |
| CRC stage I                  | 14              | 5.2  | 20           | 7.8  | 1                           | 14.3  | 35          | 6.6  |          |
| CRC stage II                 | 57              | 21.3 | 65           | 25.4 | 1                           | 14.3  | 123         | 23.2 |          |
| CRC stage III                | 82              | 30.6 | 95           | 37.1 | 3                           | 42.9  | 180         | 33.9 |          |
| CRC stage IV                 | 90              | 33.6 | 61           | 23.8 | 2                           | 28.6  | 153         | 28.8 |          |
| NA                           | 25              | 9.3  | 15           | 5.9  | 0                           | 0.0   | 40          | 7.5  |          |
| Frequency of hospitalization |                 |      |              |      |                             |       |             |      | 0.059    |
| 1 time                       | 142             | 53.0 | 132          | 51.6 | 7                           | 100.0 | 281         | 52.9 |          |
| <=5 times                    | 67              | 25.0 | 84           | 32.8 | 0                           | 0.0   | 151         | 28.4 |          |
| >5 times                     | 59              | 22.0 | 40           | 15.6 | 0                           | 0.0   | 99          | 18.6 |          |
| Mean (times)                 | 3.4             |      | 3.1          |      | 1                           |       | 3.2         |      |          |
| Days of hospitalization      |                 |      |              |      |                             |       |             |      |          |
| Per visit (mean/SD)          | 10.9 (9.36)     |      | 15.4 (15.9)  |      | 17.4 (9.6)                  |       | 13.1 (12.9) |      |          |
| No. day within a year (mean) | 36.96269        |      | 47.09766     |      | 24.85714                    |       | 41.68927    |      |          |

p-value\*: chi-square test

Supplementary Table S3. Characteristics of respondents who provide data on direct non-medical cost, Hue Central Hospital, 2019 (n=120)

| Variables                | Number (n) | Percent (%) |
|--------------------------|------------|-------------|
| Age group                |            |             |
| 20-39                    | 14         | 11.67       |
| 40-59                    | 42         | 35          |
| 60+                      | 64         | 53.33       |
| Age - Mean/SD, (min-max) | 57.2/13.23 | (20-85)     |
| Gender                   |            |             |
| Male                     | 67         | 55.83       |
| Female                   | 53         | 44.17       |
| Jobs                     |            |             |
| Business                 | 6          | 5           |

| Variables        | Number (n) | Percent (%) |
|------------------|------------|-------------|
| Employment       | 19         | 15.83       |
| Agriculture      | 51         | 42.5        |
| No job/older     | 44         | 36.67       |
| Region           |            |             |
| Urban            | 38         | 31.93       |
| Rural            | 82         | 68.07       |
| Economic         |            |             |
| Poorest          | 4          | 3.36        |
| Near poor        | 33         | 27.73       |
| Fair             | 82         | 68.91       |
| Marital status   |            |             |
| married          | 95         | 79.17       |
| Divorce          | 5          | 4.17        |
| Single           | 20         | 16.67       |
| Education        |            |             |
| primary          | 52         | 43.33       |
| Secondary        | 35         | 29.17       |
| High school      | 14         | 11.67       |
| College          | 19         | 15.83       |
| Health insurance |            |             |
| Yes              | 112        | 93.33       |
| 95%              | 57         | 47.5        |
| 100%             | 55         | 45.83       |
| No               | 8          | 6.67        |
| Types of cancer  |            |             |
| C18              | 44         | 36.67       |
| C20              | 76         | 63.33       |
| CRC Stages       |            |             |
| I                | 4          | 3.33        |
| II               | 24         | 20          |
| III              | 64         | 52.5        |
| IV               | 28         | 24.1        |

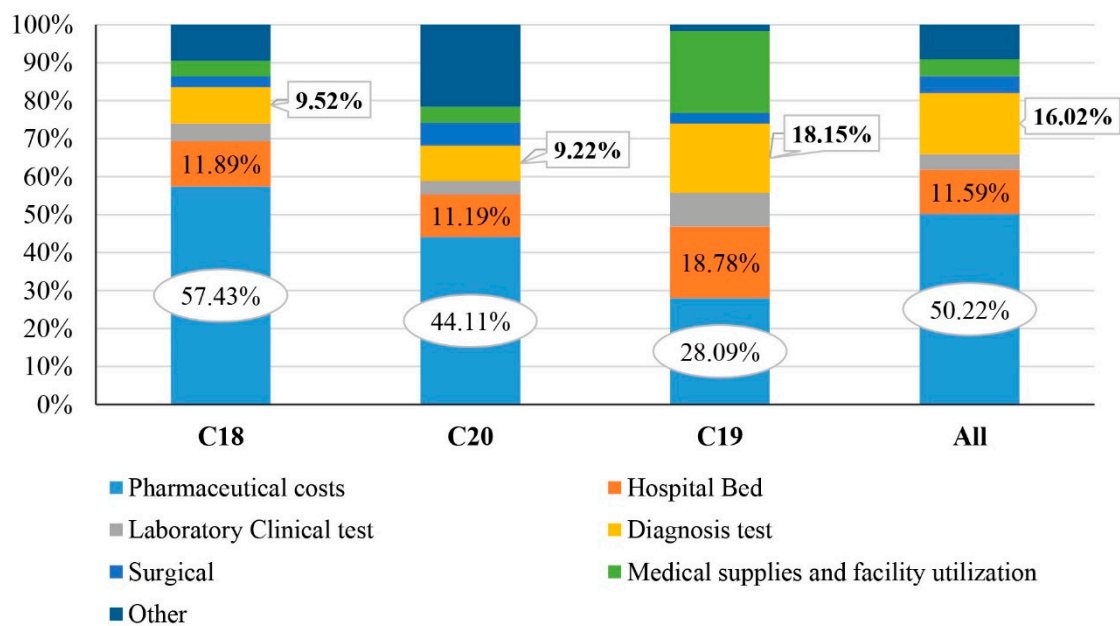

**Supplementary Figure S1.** Percentage of medical cost components for CRC patients, Hue Central Hospital, Vietnam 2018 (n=531)

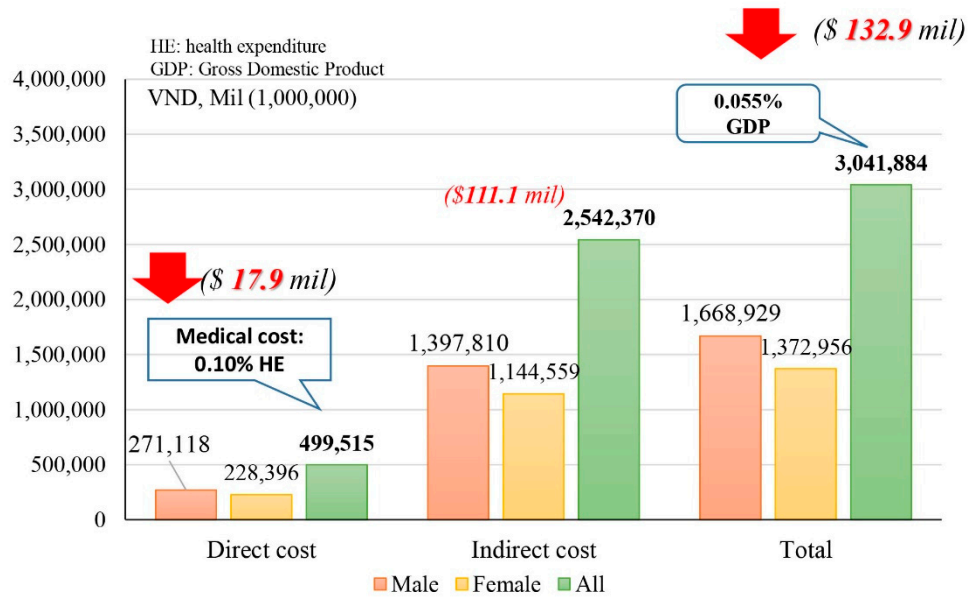

**Supplementary Figure S2.** Direct cost and indirect cost of CRC at national level in Vietnam, 2018 (Mil, Million), Exchange rate in 2018: US \$1 = VND 22,880
